Anesthesiology  
2000; 92:1488  
© 2000 American Society of Anesthesiologists, Inc.  
Lippincott Williams & Wilkins, Inc.

## Vasoconstrictive versus Vasodilatory Effects of Alpha-2 Adrenergic Agonists on the Spinal Microcirculation

**To the Editor:**—I read with interest the study about the effect of  $\alpha$ -2 adrenergic agonists on the spinal pial microcirculation in dogs.<sup>1</sup> Using an *in vivo* technique, the authors observed a significant constriction of both pial arterioles and venules after topical application of clonidine or dexmedetomidine. They suggested that  $\alpha$ -2 agonists might be superior to epinephrine or phenylephrine as local anesthetics additives since the latter induced a greater constriction of pial microvessels and therefore may jeopardize spinal blood flow. It has been known that  $\alpha$ -2 adrenoceptors are present on both vascular smooth muscles and endothelial cells. The stimulation of  $\alpha$ -2 adrenoceptors on vascular smooth muscles is associated with constriction in most vascular beds, whereas activation of endothelial  $\alpha$ -2 adrenoceptors relaxes the vascular smooth muscle through a release of endothelium-derived nitric oxide. Distribution of  $\alpha$ -2 adrenoceptors may be heterogeneous in various vascular beds. While  $\alpha$ -2 adrenergic stimulation induces constriction of canine pial<sup>1</sup> and rat intestinal arterioles,<sup>2</sup> vasodilation predominates in response to clonidine in the porcine coronary<sup>3</sup> and rat coronary<sup>4</sup> and uterine<sup>5</sup> microcirculation in which nitric oxide plays an important role in the regulation of regional blood flow. Thus, net effect of vascular  $\alpha$ -2 adrenergic stimulation is determined by basal  $\alpha$ -2 adrenergic activity in the vascular smooth muscle and endothelium. In addition, alterations in endothelial function and structure may affect endothelium-dependent  $\alpha$ -2-adrenoceptor-mediated relaxation because of changes in the signal transduction of  $\alpha$ -2 adrenergic pathway and production of nitric oxide. Previous study has shown that endothelial injury increases constriction of coronary arterioles to clonidine in septic rats.<sup>4</sup> An increase in relaxation response to clonidine is observed in uterine arterioles of pregnant rats,<sup>5</sup> likely caused by increased release of nitric oxide. However, no prior study has determined the effect of activation of endothelial  $\alpha$ -2 adrenoceptors on vascular reactivity of the spinal microcirculation under different physiologic and pathophysiologic states (e.g., pregnancy and arteriosclerosis). It is plausible that changes in the endothelium-dependent  $\alpha$ -2 adrenoceptor-mediated relaxation of pial microvessels may alter vaso-

constrictive effect of  $\alpha$ -2 agonists and even duration of spinal anesthesia. Therefore, the conclusion about effectiveness of  $\alpha$ -2 adrenergic agonists as local anesthetics additives needs to be reached from the experiment in which the contribution of endothelial  $\alpha$ -2 adrenoceptors is determined.

**Steven Y. Wang, M.D., Ph.D.**  
Department of Anesthesiology  
Perioperative, and Pain Medicine  
Brigham and Women's Hospital  
Harvard Medical School  
Boston, Massachusetts  
sywang@bics.bwh.harvard.edu

## References

1. Iida H, Ohata H, Iida M, Watanabe Y, Dohi S: Direct effects of alpha-1 and alpha-2 adrenergic agonist on spinal and cerebral pial vessels in dogs. *ANESTHESIOLOGY* 1999; 91:479–85
2. Cameron EM, Wang SY, Fink MP, Sellke FW: Mesenteric and skeletal muscle microvascular responsiveness in subacute sepsis. *Shock* 1998; 9:184–92
3. Wang SY, Friedman M, Johnson RG, Weintraub RM, Sellke FW: Adrenergic regulation of coronary microcirculation after extracorporeal circulation and crystalloid cardioplegia. *Am J Physiol* 1994; 67:H2462–H2470
4. Wang SY, Cameron EM, Fink MP, Sellke FW: Chronic septicemia alters alpha adrenergic mechanisms in the coronary circulation. *J Surg Res* 1997; 69:61–6
5. Wang SY, Segal S, Thomas JA, Datta S: Pregnancy alters adrenergic mechanisms in the uterine microcirculation in rats. *ANESTHESIOLOGY* 1998(suppl): A4

(Accepted for publication December 9, 1999.)

Anesthesiology  
2000; 92:1488–9  
© 2000 American Society of Anesthesiologists, Inc.  
Lippincott Williams & Wilkins, Inc.

**In Reply:**—The question raised by Dr. Wang is very important on a scientific basis as well as on a basis of clinical relevancy of our study.<sup>1</sup>

It is well known that vasoconstrictors such as epinephrine, phenylephrine, and clonidine prolong the duration of action of various local anesthetics after subarachnoid administration. The mechanism(s) for this prolongation involve both vasoconstriction and antinociception from  $\alpha$ -2-stimulation. As Dr. Wang pointed out, vasoconstrictive response to  $\alpha$ -2-adrenergic stimulation could be influenced by release of nitric oxide. Coughlan *et al.*<sup>2</sup> reported in an *in vitro* study that

N<sup>w</sup>-nitro-L-arginine methyl ester, an inhibitor of nitric oxide synthase, was associated with exaggerated constrictor response to dexmedetomidine in coronary, but not in cerebral arteries. *In vivo*, McPherson *et al.*<sup>3</sup> demonstrated that inhibition of nitric oxide synthase by systemic N<sup>w</sup>-nitro-L-arginine methyl ester did not affect dexmedetomidine-induced decreases in cerebral blood flow. In addition, we also found that pretreatment with N<sup>w</sup>-nitro-L-arginine methyl ester failed to influence the response of cerebral pial arterioles to 10<sup>-3</sup>M dexmedetomidine in the same experimental design.<sup>4</sup> Further oppositely, it has been re-

## CORRESPONDENCE

ported that in isolated rat's cerebral artery, dilation produced by  $\alpha_2$ -agonist was blocked with inhibition of nitric oxide synthase.<sup>5</sup> Because we did not examine the effect of activation of endothelial  $\alpha_2$ -adrenoceptors on vascular reactivity of the spinal microcirculation *via* production of nitric oxide, we cannot exclude the possibility that the change of endothelial function attributable to different physiologic and pathologic states may alter the vasoconstrictive effect of  $\alpha_2$ -agonists and the effectiveness as local anesthetic additives.

In addition, we previously reported that the pial vascular effects of  $\alpha_2$ -agonists were modulated *via* potassium channel activation using a cranial window preparation. The vasoconstrictive effects of dexmedetomidine and clonidine seem to be mediate *via* activation of  $\alpha_2$ -adrenoceptors, and partly counterbalanced vasodilation *via* activation of adenosine triphosphate sensitive potassium channels.<sup>4,6</sup> Moreover, we also reported that local anesthetics such as bupivacaine and ropivacaine *per se* affect spinal pial vessels, even to the different direction, affecting the duration during spinal anesthesia.<sup>7</sup>

Therefore, it is possible that not only nitric oxide, but also other possible vasoactive condition including adenosine triphosphate sensitive potassium channels activation and concomitantly used local anesthetics could modulate the vasoconstrictive effects of  $\alpha_2$ -agonists.

**Hiroki Iida, M.D.**

Associate Professor

Department of Anesthesiology and Critical Care Medicine  
iida@cc.gifu-u.ac.jp

**Hiroto Ohata, M.D.**

Instructor

Department of Anesthesiology and Critical Care Medicine

**Mami Iida, M.D.**

Visiting Assistant Professor

2nd Department of Internal Medicine

**Yukinaga Watanabe, M.D.**

Assistant Professor

Department of Anesthesiology and Critical Care Medicine

**Shuji Dohi, M.D.**

Professor and Chair

Department of Anesthesiology and Critical Care Medicine

Gifu University School of Medicine

Gifu 500-8705, Japan

## References

1. Iida H, Ohata H, Iida M, Watanabe Y, Dohi S: Direct effects of  $\alpha_2$ - and  $\alpha_2$ -adrenergic agonists on spinal and cerebral pial vessels in dogs. *ANESTHESIOLOGY* 1999; 91:479-85
2. Coughlan MG, Lee JG, Bosnjak ZJ, Schmeling WT, Kampine JP, Wartier DC: Direct coronary and cerebral vascular responses to dexmedetomidine. *ANESTHESIOLOGY* 1992; 77:998-1006
3. McPherson RW, Kirsch JR, Traystman RJ: Inhibition of nitric oxide synthase does not affect  $\alpha_2$ -adrenergic-mediated cerebral vasoconstriction. *Anesth Analg* 1994; 78:67-72
4. Ishiyama T, Dohi S, Iida H, Watanabe Y, Shimonaka H: Mechanisms of dexmedetomidine-induced cerebrovascular effects in canine *in vivo* experiments. *Anesth Analg* 1995; 81:1208-15
5. Bryan RM Jr, Eichler MY, Swafford MWG, Johnson TD, Suresh MS, Childres WF: Stimulation of  $\alpha_2$ -adrenoceptors dilates the rat middle cerebral artery. *ANESTHESIOLOGY* 1996; 85:82-90
6. Ishiyama T, Dohi S, Iida H: The vascular effects of topical and intravenous  $\alpha_2$ -adrenoceptor agonist clonidine on canine pial microcirculation. *Anesth Analg* 1998; 86:766-72
7. Iida H, Watanabe Y, Dohi S, Ishiyama T: Direct effects of ropivacaine and bupivacaine on spinal pial vessels in canine. Assessment with closed spinal window technique. *ANESTHESIOLOGY* 1997; 87:75-81

(Accepted for publication December 9, 1999.)

Anesthesiology  
2000; 92:1489-91  
© 2000 American Society of Anesthesiologists, Inc.  
Lippincott Williams & Wilkins, Inc.

## Bias in a Further Model for Predicting PONV May Not Advance Current Knowledge

*To the Editor:*—Although we were happy to welcome a further addition to the literature on postoperative nausea and vomiting by Sinclair and colleagues, we were amazed by its omissions and a little more by its contents. In April 1998, an editorial posed the question "Can we predict who will vomit after surgery?"<sup>1</sup> and we were therefore surprised that this was not quoted by Sinclair and colleagues in their similarly entitled publication "Can postoperative nausea and vomiting be predicted?", which was submitted about half a year later.<sup>2</sup> We were even more surprised that the authors stated in the introduction that "the degree to which factors are predictors of PONV remains unknown." This is plainly incorrect since a number of authors have attempted to quantify risk factors for postoperative nausea and vomiting (PONV) using logistic regression models.<sup>3-7</sup> None of these studies

were quoted in the introduction and some were briefly mentioned in the discussion only to be dismissed. The introduction gives the misleading impression that a completely new idea and concept has been developed.<sup>2</sup>

Palazzo and Evans were the first to use logistic regression analysis to quantify the relative impact of fixed patient factors on the probability of PONV in 1993.<sup>3</sup> Their study was criticized for being only applicable to one type of surgery.<sup>2</sup> However, Dr Sinclair and colleagues failed to mention that this model was tested by Toner *et al.* in patients from a different hospital having a wide spectrum of operations with all sorts of anesthetists and anesthetics to test its robustness as a model.<sup>8</sup> The study of Koivuranta *et al.*<sup>6</sup> was criticized for no analysis of anesthesia-related factors. Again, this was misquoted as general and regional
